# Supplementary material
Source: publisher figshare collection journal article supplement (https://acs.figshare.com/ndownloader/files/11021534)
Supplement: Supplementary file 1 [file 11021534]

data_zipper_24_4.790
_audit_creation_method         'generated by CrystalMaker 9.2.6'
_publ_section_comment
;
(Imported from a VASP structure file)

C  H  N
;
_cell_length_a                  15.0000(0)
_cell_length_b                  15.0000(0)
_cell_length_c                   4.7900(0)
_cell_angle_alpha               90.0000(0)
_cell_angle_beta                90.0000(0)
_cell_angle_gamma               90.0000(0)

_symmetry_space_group_name_H-M     'P 1'
_symmetry_Int_Tables_number         1
_symmetry_cell_setting             triclinic
loop_
_symmetry_equiv_pos_as_xyz
'+x,+y,+z'

loop_
_atom_site_label
_atom_site_type_symbol
_atom_site_occupancy
_atom_site_fract_x
_atom_site_fract_y
_atom_site_fract_z
    C1    C  1.0000      0.4164    0.5197    0.9170
    C2    C  1.0000      0.4519    0.5715    0.6714
    C3    C  1.0000      0.4676    0.4277    0.9096
    C4    C  1.0000      0.5545    0.5722    0.7490
    C5    C  1.0000      0.5902    0.4889    0.2485
    C6    C  1.0000      0.5211    0.4151    0.1752
    C7    C  1.0000      0.4596    0.4294    0.4211
    C8    C  1.0000      0.5879    0.4879    0.5925
    C9    C  1.0000      0.5545    0.5726    0.0897
   C10    C  1.0000      0.4521    0.5713    0.1629
    H1    H  1.0000      0.3437    0.5118    0.9179
    H2    H  1.0000      0.4182    0.3733    0.9039
    H3    H  1.0000      0.4237    0.6392    0.6616
    H4    H  1.0000      0.5895    0.6321    0.6748
    H5    H  1.0000      0.6582    0.4721    0.1819
    H6    H  1.0000      0.5495    0.3478    0.1847
    H7    H  1.0000      0.4028    0.3828    0.4341
    H8    H  1.0000      0.6539    0.4667    0.6672
    H9    H  1.0000      0.5882    0.6335    0.1614
   H10    H  1.0000      0.4238    0.6391    0.1717
    N1    N  1.0000      0.5199    0.4165    0.6534
    N2    N  1.0000      0.4276    0.5249    0.4167
